# Supplementary material for: Narrative art and music intervention with incarcerated abused women
Source: Royal Society of Chemistry journal article supplement (doi:10.1039/c3tb20769b), 2005-01-01
Supplement: c3tb20769b.pdf [file c3tb20769b.pdf]

## Ni(II)-modified solid substrates as a platform to adsorb His-tag proteins

Laura E. Valenti<sup>a,#</sup>, Vitor L. Martins<sup>b,#</sup>, Elisa Herrera<sup>a</sup>, Roberto M. Torresi<sup>b</sup>, Carla E. Giacomelli<sup>a,\*</sup>

a- Instituto de Investigaciones en Físico Química de Córdoba (INFIQC) CONICET-UNC, Departamento de Fisicoquímica, Facultad de Ciencias Químicas, Universidad Nacional de Córdoba, Ciudad Universitaria, X5000HUA Córdoba Argentina.

b- Instituto de Química - Universidade de São Paulo – Av. Prof. Lineu Prestes 748, 05508-000 São Paulo, SP, Brazil

# Both authors contributed equally to this manuscript.

\*Corresponding author.

### Supplementary information

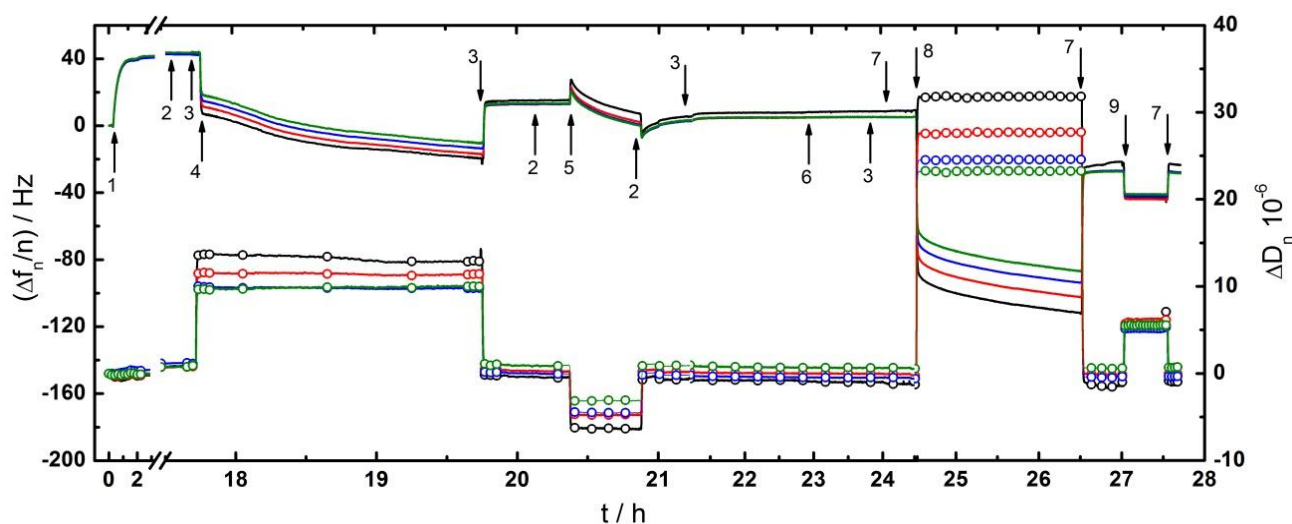

Figure S1: QCM-D *in situ* response given by  $\Delta f_n$  (lines, left axis) and  $\Delta D_n$  (line + symbols, right axis) at overtones ( $n$ ) 5 (black), 7 (red), 9 (blue), and 11 (green) for the five steps involved in the modification of the gold substrates: I: cysteamine in absolute ethanol (arrow 1), II: glutaraldehyde in pyridine buffer (arrow 4); III:  $\text{Ac}_2\text{O}$  in absolute ethanol (arrow 5); IV: aqueous solution of  $\text{NaBH}_4$  (arrow 6); and V: aqueous solution of Ni(II) (arrow 8). The last step represents the addition of a  $0.2 \text{ mol L}^{-1}$   $\text{KNO}_3$  solution (arrow 9). The arrows 2, 3 and 7 indicate the addition of absolute ethanol, pyridine buffer, and water, respectively.

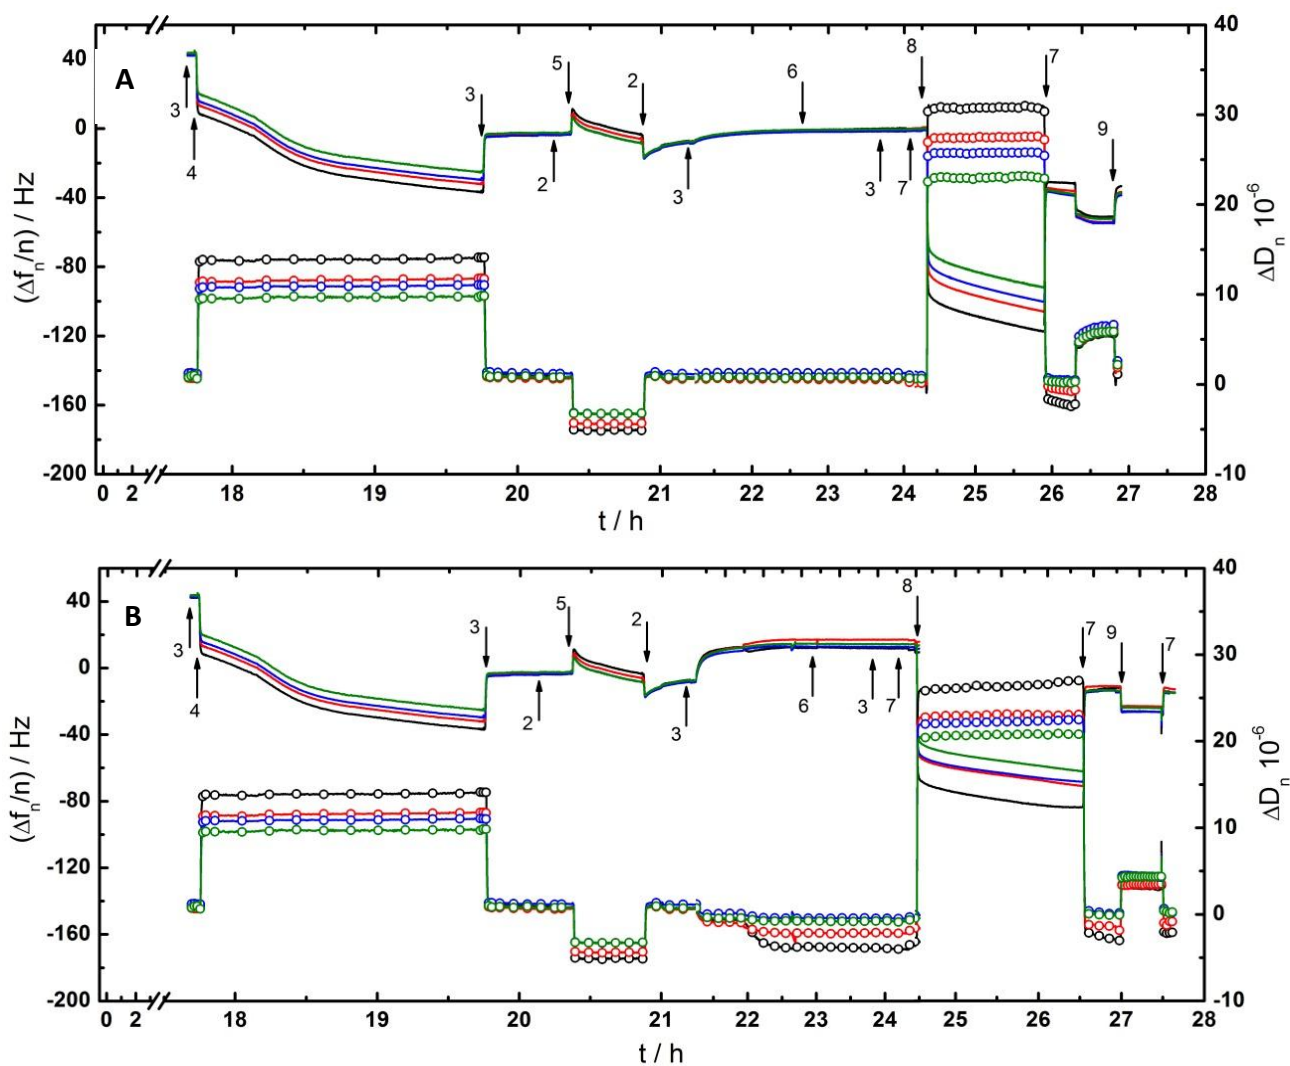

Figure S2: QCM-D *in situ* response given by  $\Delta f_n$  (lines, left axis) and  $\Delta D_n$  (line + symbols, right axis) at overtones ( $n$ ) 5 (black), 7 (red), 9 (blue), and 11 (green) for the five steps involved in gold modification in absence of cysteamine: II: glutaraldehyde in pyridine buffer (arrow 4); III: Ac<sub>2</sub>O in absolute ethanol (arrow 5); IV: aqueous solution of NaBH<sub>4</sub> (arrow 6); V: aqueous solution of Ni(II) (arrow 8). The last step represents the addition of a 0.2 mol L<sup>-1</sup> Histidine (A) or 1.0 mol L<sup>-1</sup> KNO<sub>3</sub> (B) addition (arrow 9). The arrows 2, 3 and 7 indicate the addition of absolute ethanol, pyridine buffer and water, respectively.

*This figure shows the experiment control corresponding to Figure 3 and S1, all the modifications were carried out without the first step (cysteamine – gold reaction), so the modification starts from glutaraldehyde (step II) until Ni(II) addition (step V). Note that the experiment starts at 17 hours, and the  $\Delta f_n$  and  $\Delta D_n$  start in 43 Hz and  $0.75 \cdot 10^{-6}$ , respectively, in order to compare with the complete modification.*

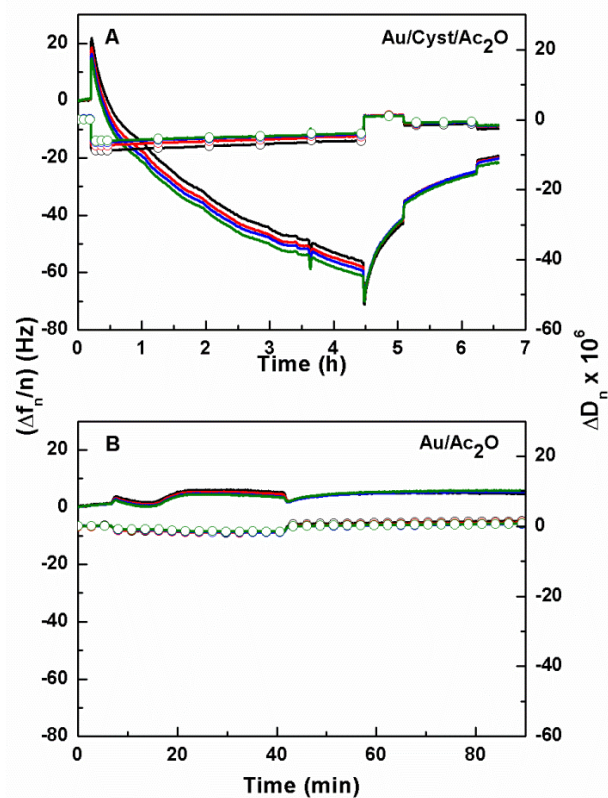

Figure S3: QCM-D in situ response given by  $\Delta f_n$  (lines, left axis) and  $\Delta D_n$  (line + symbols, right axis) at overtones (n) 5 (black), 7 (red), 9 (blue), and 11 (green) for the Ac<sub>2</sub>O addition to Au/Cyst (A) and Au (B) substrates. Note that time scale is different between these experiments.

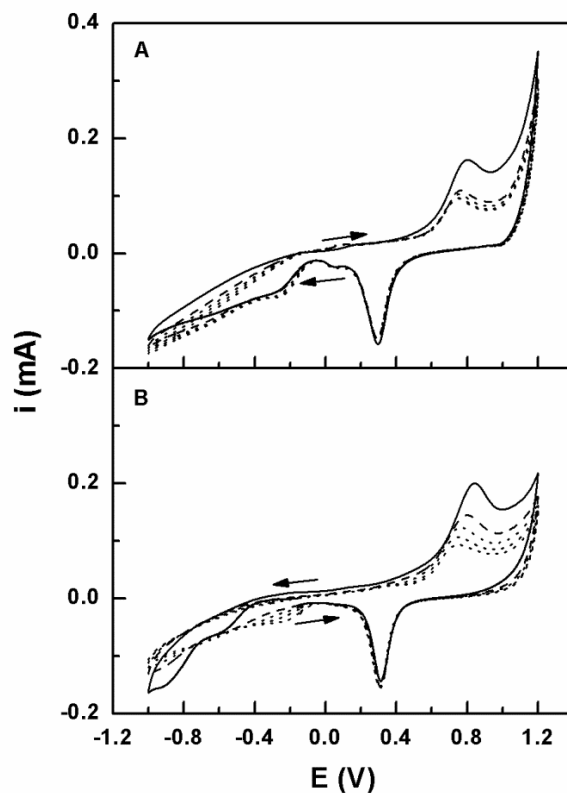

Figure S4: CV of Au/Cyst electrode for different potential cycles (first (solid line), second (dashed line) and third to fifth (dotted line) cycles) in 50 mM phosphate buffer pH 8.0 at 100 mV/s. The arrows indicate the direction of the scans.

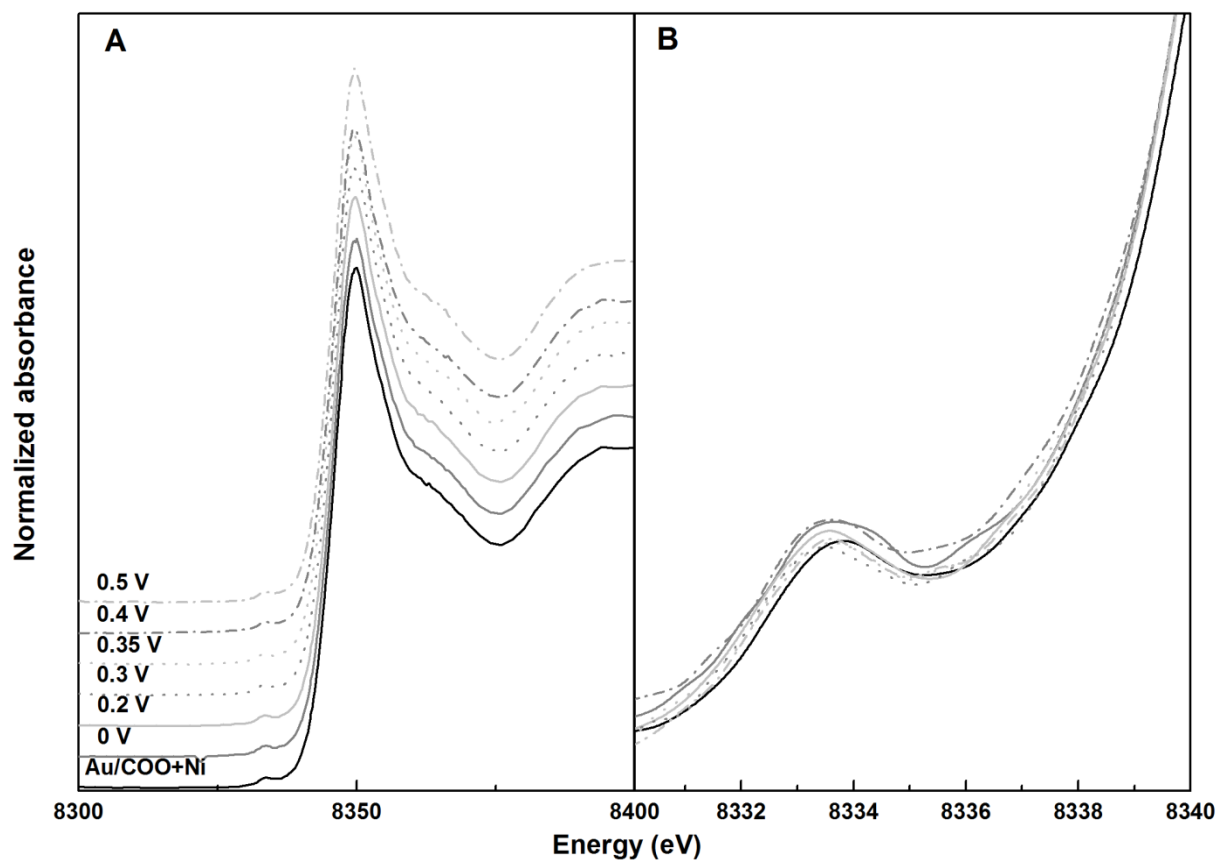

Figure S5: A: XANES spectra of the Ni(II) surface complexes on gold substrate at different applied potentials (vs. Ag/AgCl/KCl<sub>sat</sub>). B: Pre-edge peak of the spectra shown in S5-A.
